# Supplementary material
Source: ML conference proceedings conference paper supplement (https://proceedings.neurips.cc/paper_files/paper/2019/hash/dc960c46c38bd16e953d97cdeefdbc68-Abstract.html)
Supplement: Supplementary file [file dc960c46c38bd16e953d97cdeefdbc68-Supplemental.zip]

---

# Supplementary Material for A Tensorized Transformer for Language Modeling

---

Xindian Ma<sup>1</sup>, Peng Zhang<sup>1\*</sup>, Shuai Zhang<sup>1</sup>,  
Nan Duan<sup>2</sup>, Yuexian Hou<sup>1</sup>, Dawei Song<sup>3</sup>, Ming Zhou<sup>2</sup>

<sup>1</sup>College of Intelligence and Computing, Tianjin University, Tianjin, China

<sup>2</sup>Microsoft Research Asia, Beijing, China

<sup>3</sup>School of Computer Science and Technology, Beijing Institute of Technology, Beijing, China

{xindianma, pzhang, szhang96, yxhou}@tju.edu.cn

{nanduan, mingzhou}@microsoft.com

{dwsong}@bit.edu.cn

## A Tensor and Tensor Slice

As introduced in [2], a tensor and the tensor slice can be defined as follows.

**Definition 1** (tensor). Let  $D_1, D_2, \dots, D_N \in \mathbb{N}$  denote index upper bounds. A tensor  $\mathcal{A} \in \mathbb{R}^{D_1, \dots, D_N}$  of order  $N$  is an  $N$ -way array where elements  $\mathcal{A}_{d_1, d_2, \dots, d_n}$  are indexed by  $d_n \in \{1, 2, \dots, D_n\}$  for  $1 \leq n \leq N$ .

The concept of tensor slice is specified as:

**Definition 2** (tensor slice). A tensor slice is a two-dimensional section (fragment) of a tensor, obtained by fixing all indexes except for two indexes.

## B Theorem 3.1

Let  $e_1, \dots, e_n$  be basis vectors from the vector space  $S$ . Assume that these vectors  $e_1, \dots, e_n$  are linear independent and  $Q, K, V$  can be linearly represented by this set of basis vectors. The output of self-attention function in Eq. 2 (in the paper) can be represented by a linear combination of the set of these basis vectors.

$$\text{Attention}(Q, K, V) = (e_1, \dots, e_n)M, \quad (1)$$

where  $M \in \mathbb{R}^{n \times d}$  is a coefficient matrix, and  $d$  is a dimension of these matrices (i.e.,  $Q$ ,  $K$ , and  $V$ ).

*Proof.* If  $Q$ ,  $K$  and  $V \in \text{Span}(e_1, \dots, e_n)$ , the linear combination representation of matrices  $Q, K$  and  $V$  can be written as follows:

$$\begin{cases} Q = (e_1, e_2, \dots, e_n) (\alpha_1, \alpha_2, \dots, \alpha_d) \\ K = (e_1, e_2, \dots, e_n) (\beta_1, \beta_2, \dots, \beta_d) \\ V = (e_1, e_2, \dots, e_n) (\xi_1, \xi_2, \dots, \xi_d) \end{cases} \quad (2)$$

The self-attention function is written as follows [8]:

$$\text{Attention}(Q, K, V) = \text{softmax}\left(\frac{QK^T}{\sqrt{d}}\right)V, \quad (3)$$

---

\*Corresponding Author: Peng Zhang

where  $QK^T$  can be computed as follows:

$$QK^T = (e_1, e_2, \dots, e_n) (\alpha_1, \alpha_2, \dots, \alpha_d) (\beta_1, \beta_2, \dots, \beta_d)^T (e_1, e_2, \dots, e_n)^T \quad (4)$$

As a result, the input of *softmax* function is a product of coefficient matrices  $(\alpha_1, \dots, \alpha_d)$  and  $(\beta_1, \dots, \beta_d)^T$ . Then, we have

$$\text{softmax}\left(\frac{QK^T}{\sqrt{d}}\right) = (e_1, \dots, e_n) \text{softmax}(A/\sqrt{d}) (e_1, \dots, e_n)^T \quad (5)$$

where the matrix  $A$  is equal to  $(\alpha_1, \dots, \alpha_d) (\beta_1, \dots, \beta_d)^T$ . Therefore, the attention representation can be written as follows:

$$\begin{aligned} \text{softmax}\left(\frac{QK^T}{\sqrt{d}}\right)V &= (e_1, e_2, \dots, e_n) \text{softmax}(A/\sqrt{d}) (\xi_1, \xi_2, \dots, \xi_d) \\ &= (e_1, e_2, \dots, e_n) M \end{aligned} \quad (6)$$

where the matrix  $M$  is equal to  $\text{softmax}(A/\sqrt{d}) (\xi_1, \xi_2, \dots, \xi_d)$ . The  $\text{softmax}(A/\sqrt{d})$  is to normalize the coefficient matrices of  $Q$  and  $K$ . It turns out that the output of the attention function [8] can be represented by a linear combination of the set of basic vectors.  $\square$

After the proof, it is helpful to describe the basic idea. First, we consider that the self-attention function can be linearly represented by a set of orthogonal basis vectors, when the input of *softmax* function is the product of two coefficient matrices,  $(\alpha_1, \alpha_2, \dots, \alpha_d)$  and  $(\beta_1, \beta_2, \dots, \beta_d)^T$ , respectively. Second, in constructing the multi-head mechanism, the matrices of basis vectors  $(e_1, e_2, \dots, e_n)$  can be shared.

## C Corollary 1

Under the same conditions as in Theorem 3.1 and the value of  $N$  is equal to the value of  $d$ , the Single-block attention representation Eq. 5 (in the paper) can reconstruct the *Scaled Dot-Product attention* in Eq. 2 (in the paper) by the summing over the tensor (i.e., the output of Single-block attention function) according to the second index. It holds that:

$$\text{Attention}(Q, K, V)_{i,m} = \sum_{j=1}^N \text{Atten}_{TD}(\mathcal{G}; Q, K, V)_{i,j,m}, \quad (7)$$

where  $i, j$  and  $m$  are the indices of the Single-block attention output (i.e., a 3-order tensor).  $\text{Atten}_{TD}(\cdot)$  is the function of the Single-block attention based on Tucker decomposition.  $i$  and  $m$  are the indices of outputs (i.e., a matrix) from Eq. 2 (in the paper).

*Proof.* In Theorem B, we have proved the results about the attention function can be represented by a linear combination of basis vectors. Therefore, we can represent the self-attention function in Eq. 2 (in the paper) by the form as follows:

$$\text{Attention}(Q, K, V) = \Theta QK^T V \quad (8)$$

where  $\Theta$  is a normalization factor matrix, which can be used to replace the use of a *softmax* function. We assume that  $\Theta$  contains all the non-zero elements of the core tensor  $\mathcal{G}$ . The self-attention in Eq. 2 (in the paper) can be re-written as follows:

$$X_{i,m} = \sum_{k=1}^N \sum_{r=1}^R \Theta_{i,m} Q_{i,r} K_{k,r} V_{k,m} \quad (9)$$

where  $N$  is the length of a sentence,  $X_{i,m} = \text{Attention}(Q, K, V)_{i,m}$  is the entry of the output from the self-attention, and  $R$  is equal to  $d$ . Here the core tensor  $\mathcal{G}$  is same as that in Eq. 7 (in the paper). Then, the Single-block attention (a 3-order tensor) can be represented as follows:

$$\mathcal{A}_{i,j,m} = \sum_p^R \sum_q^R \sum_r^R \mathcal{G}_{p,q,r} Q_{i,p} K_{j,p} V_{m,r} \quad (10)$$

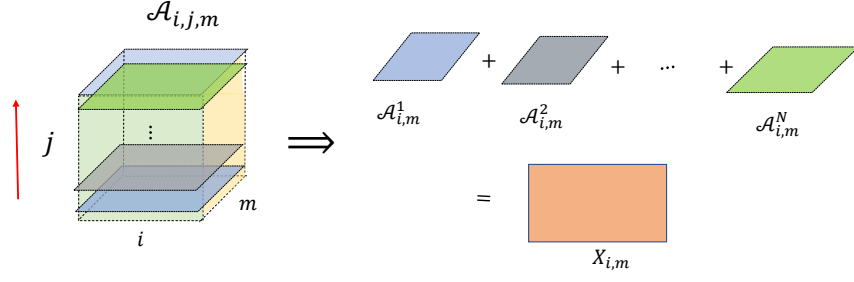

Figure 1: Tensor  $\mathcal{A}$  is a 3-order tensor, which represents the Single-block attention in the left.  $\mathcal{A}_{i,j,k}$  is the entry of the tensor  $\mathcal{A}$ . In the right, the graph represents that the summing of tensor slices which is from the tensor splitting in index  $j$ . This graph can help us to understand the main content of corollary C.

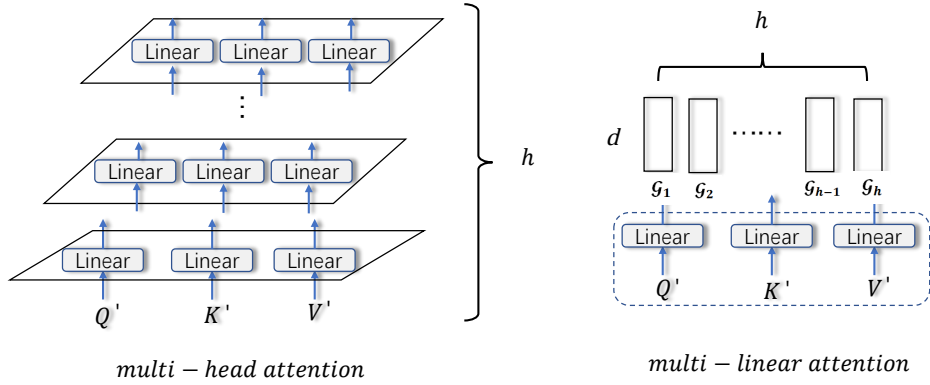

Figure 2: A diagram about a comparison of parameters between multi-linear attention and multi-head attention.

where  $\mathcal{A}$  is a 3-order tensor, which is equal to  $Atten_{TD}(\mathcal{G}; Q, K, V)$ . Accordingly,  $\mathcal{A}_{i,j,m}$  is a entry in tensor  $\mathcal{A}$  and is equal to  $Attention_{TDi,j,m}$  in Eq. 7. Next, we aim to prove Eq. 7 can be established. Therefore, we need to establish the relation between Eq. 10 and Eq. 9. Since the core tensor  $\mathcal{G}$  is a special tensor (i.e., diagonal tensor), Eq. 10 can be written as follows:

$$\mathcal{A}_{i,j,m} = \sum_{r=1}^R \mathcal{G}_{r,r,r} Q_{i,r} K_{j,r} V_{m,r} \quad (11)$$

After that, we can compute the attention representation through adding to model  $k$ . For better understanding, we give the graph representation in Figure 1.

$$X_{i,m} = \sum_{j=1}^N \sum_{r=1}^R \mathcal{G}_{r,r,r} Q_{i,r} K_{j,r} V_{m,r}$$

The corollary then holds.  $\square$

## D Compression Ratio about Multi-Linear Attention

In order to compute the compression ratio, we need to compare multi-linear attention with multi-head attention. The comparison chart has been given in Figure 2.

In Figure 2, each *Linear* function in multi-head attention is about a weight matrix  $W \in \mathbb{R}^{d_{model} \times d}$ , and all weight matrices in multi-head attention are different. In multi-linear attention, three weight matrices are used and  $h$  (a number) weight vectors are used. Through the analysis about Figure 2, the

compression ratio is computed as follows.

$$\begin{aligned} \text{compression ratio} &= \frac{3 \times h \times d_{\text{model}} \times d}{3 \times d_{\text{model}} \times d + h \times d} \\ &= \frac{3 \times h \times d_{\text{model}}}{3 \times d_{\text{model}} + h} \end{aligned} \quad (12)$$

In practice,  $h$  is equal to 8 and  $d$  is equal to 512. The compression ratio approximates 8 in this case. In our work, the dimension of vector  $\mathcal{G}_r$  is set as  $R$  which is smaller than  $d$ , where  $d$  is the dimension of attention matrix.

**Low-rank Approximation for Model Compression** In the paper, we have described that our method combines two compression ideas, namely low-rank approximation and parameters sharing. Parameters sharing can be understood through the description of Figure 2. In Multi-linear attention, the idea of low-rank decomposition also has the function of model compression. We have proved that the Single-block attention can re-construct an one-head self-attention in Transformer. In order to obtain the representation of a tensorized attention, we adopt the tensor splitting and the concat function. After that, we consider that each tensor slice from tensor splitting approximates the output of the self-attention function Eq. 2 (in the paper). When we only focus on the idea of low-rank approximation, the compression ratio can be computed by the form,  $\frac{N \times d}{N \times N}$ , where  $N$  is the length of a sequence,  $d$  is the dimension of a matrix (also namely hidden size).  $N$  is smaller than  $d$ , normally.

Through combining the ideas of parameters sharing and low-rank approximation, by formally considering the rank  $R$ , the compression ratio of Multi-linear attention model can be computed as follows:

$$\text{compression ratio}_R = \frac{3 \times h \times d_{\text{model}} \times d}{3 \times d_{\text{model}} \times d + R \times h}, \quad (13)$$

where  $R$  is the rank of the core tensor  $\mathcal{G}$ . The compression ratio will be larger when  $R$  is smaller. This  $\text{compression ratio}_R$  is the compression ratio associated with  $R$ .  $R$  need to be set in practice. In experiments,  $R$  can be set to 18, which is smaller than  $d_{\text{model}}$ .

## E Experiment

### E.1 Partial Structure about Tensorized Transformer

in the paper, the multi-linear attention is proposed. In order to show that the process of incorporating multi-linear attention into Transformer, Figure 3 gives out some information about the structure.

### E.2 Experimental Details in Language Modeling

Now, we report some details of experiments as a relevant supplementary material. Firstly, we use three weight matrices  $W^q, W^k$  and  $W^v$  to linearly project the queries, keys and values. The outputs from the linear projections can be shared by  $h$  times, where  $h$  is the number of core tensors in our background (i.e., core-1( $h=1$ ), core-2( $h=2$ )). We use Block Term Tensor decomposition (BTD) to construct a new representation, namely Multi-linear attention, which is a 3-order tensor. For incorporating the proposed attention into the architecture of Transformer, we split the 3-order tensor, and then concat each matrix from the tensor. For other layers, we use the same structure as vanilla-Transformer.

#### Hardware

We trained our model on one machine with 2 NVIDIA P40 GPUs. For our base models, the hyperparameters are described in Table 1. In addition, we set the  $\text{dropout}=0.3$  in all datasets. The model is trained using 30 epochs in three datasets (PTB, WikiText-103 and One-Billion).

**Optimizer** We used the Adam optimizer and vary the learning rate over the course of training. The vary formula [8] is followed in our work. We also used the  $\text{warmup\_steps} = 4000$ . **Label Smoothing** is employed with the value  $\epsilon=0.1$ .

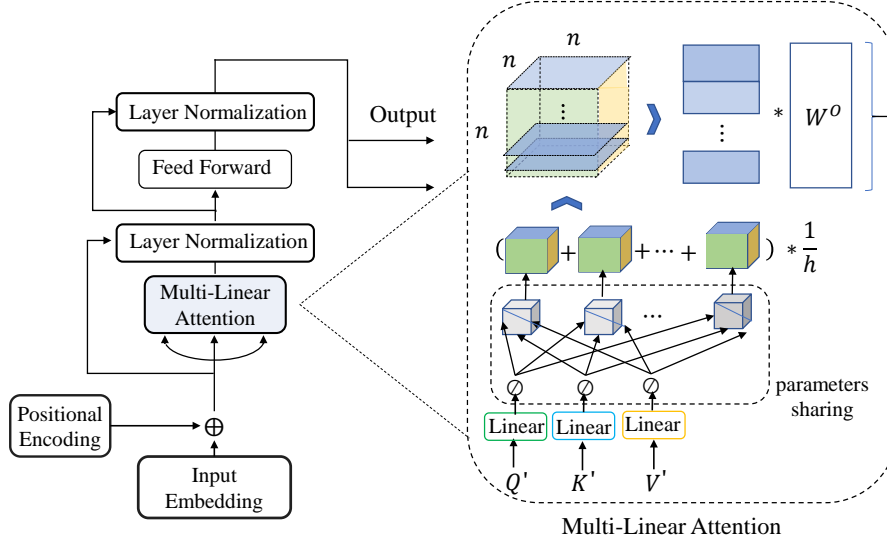

Figure 3: A diagram which is about the incorporating of multi-linear attention in partial Transformer structure. The parameters are shared in the constructing of each single-block attention.

Table 1: The hyperparameters in the Tensorized Transformers model

| Datasets     | $d_{head}$ | $d_{ff}$ | h | L | $d_k$ | $d_v$ | Test PPL |
|--------------|------------|----------|---|---|-------|-------|----------|
| PTB          | 256        | 2100     | 2 | 3 | 40    | 40    | 49.8     |
| WikiText-103 | 256        | 2100     | 2 | 6 | 40    | 40    | 18.9     |
| One-Billion  | 1024       | 2100     | 2 | 6 | 40    | 40    | 19.5     |

### E.3 Experiment Details in Neural Machine Translation

The Tensorized Transformer also has been applied to Neural Machine Translation task. In this experiment, we use the same setup with Transformer [8], and replace the multi-head attention with the proposed multi-linear attention in the encoder structure. In the decoder structure, we still use the multi-head attention for verifying the effectiveness of encoding a sentence. The model is trained in 1 NVIDIA P40 GPUs.

### E.4 Experimental comparison

For a more detailed comparison, we design these experiments as follows. In this section, we mainly show the experimental results on two language modeling datasets, i.e., PTB and WikiText-103. We show the value of perplexity, as well as FLOPs<sup>2</sup> correspondingly.

| Model                  | PTB    |       |          | WikiText-103 |        |          |
|------------------------|--------|-------|----------|--------------|--------|----------|
|                        | Params | FLOPS | Test PPL | Params       | FLOPS  | Test PPL |
| Transformer-XL [3]     | 24M    | 11.5B | 59.1     | 257M         | 996.5B | 18.3     |
| Tensorized Transformer | 24M    | 5.4B  | 52.7     | 257M         | 312.0B | 21.2     |
| Transformer-XL [3]     | –      | –     | –        | 151M         | 126.5B | 24.0     |
| Tensorized Transformer | –      | –     | –        | 151M         | 83.4B  | 18.8     |
| Transformer-XL [3]     | 12M    | 4.5B  | 87.8     | 85.5M        | 22.0B  | 34.8     |
| Tensorized Transformer | 12M    | 0.75B | 57.9     | 85.5M        | 17.3B  | 20.9     |

Table 2: Experimental comparisons on PTB and WikiText-103.

<sup>2</sup>FLOPs: The number of floating-point operations

Table 3: The same hyperparameters in Tensorized Transformers and Transformer-XL,  $N$  is the length of sequence, and  $L$  is the number of layers.

| Datasets     | Model                  | $d_{head}$ | $d_{model}$ | $N$ | $L$ | dropout | Test PPL |
|--------------|------------------------|------------|-------------|-----|-----|---------|----------|
| PTB          | Transformer-XL         | 40         | 256         | 30  | 3   | 0.3     | 81.2     |
| PTB          | Tensorized Transformer | 40         | 256         | 30  | 3   | 0.3     | 50.2     |
| WikiText-103 | Transformer-XL         | 40         | 256         | 80  | 6   | 0.1     | 34.86    |
| WikiText-103 | Tensorized Transformer | 40         | 256         | 80  | 6   | 0.1     | 19.9     |
| One-Billion  | Transformer-XL         | 40         | 1024        | 100 | 6   | 0.1     | 43.6     |
| One-Billion  | Tensorized Transformer | 40         | 1024        | 100 | 6   | 0.1     | 26.7     |

To further compare the experimental results under the same size of parameters between Tensorized Transformer and the baseline model (i.e., Transformer-XL), we add some experiments in Table 2. In our paper, we use the Tensorized Transformer of 12M on PTB dataset and the Tensorized Transformer of 85.5M on WikiText-103 dataset. To achieve the same size, i.e., 12M for Transformer-XL on PTB, we can reduce the dimensions of  $Q, K, V$  from 40 to 26. To achieve Transformer-XL of 85.5M, we reduce the dimensions of word embedding from 512 to 256. The experimental results are shown in Table 2. Our model gets better results and the lower FLOPS than Transformer-XL.

On the other hand, we can also increase the parameters of Tensorized Transformer to reach the parameters reported by Transformer-XL on PTB and WikiText-103 datasets. On PTB dataset, we can increase the number of layers from 3 to 7 to get the Tensorized Transformer of 24M. On WikiText-103 dataset, we increase the number of layers from 6 to 11 and the length of sequence from 80 to 120 to get the Tensorized Transformer of 257M. We can increase the number of layers from 6 to 8 and the length of sequence from 80 to 100 to get the Tensorized Transformer of 151M. After that, Tensorized Transformer achieves better results and lower FLOPS than Transformer-XL. These results are shown in Table 2.

In addition, we also carry out experiments when Transformer-XL has the same hyperparameters with Tensorized Transformer. Experimental results are shown in Table 3. Table 3 shows that our model can get the better results than Transformer-XL. Besides, on two datasets (i.e., PTB and WikiText-103), we also try to train our model (Tensorized Transformer) using larger dimension of word embedding (i.e.,  $d_{model}$ ). If  $d_{model}$  is larger than 256 on PTB dataset and larger than 512 on WikiText-103 dataset, the overfitting will occur. For the overfitting problem, we will investigate it in our future work.

## F Partial Code

The project have been achieved by pytorch. In this section, we give the partial code which is about our methods, i.e., Sing-block attention and Multi-linear attention. First, the class of Single-block attention is given as follows.

```

import torch
import torch.nn as nn
import torch.nn.init as init
import numpy as np

class SingleBlockAttention(nn.Module):
    '''Single block attention'''
    def __init__(self, Rank):
        super(SingleBlockAttention, self).__init__()
        self.softmax = nn.Softmax()
        self.R = Rank
    def forward(self, q, k, v, mb_size, d):
        self.core = nn.Parameter(torch.FloatTensor(np.random.rand(self.R)))
        N = v.size(1)
        self.core = self.softmax(self.R)
        core_tensor = torch.zeros(N, d, N).cuda()
        for i in range(self.R):
            cores_tensor[i][i][i] = self.core[i]
        full_matrixs = []

```

---

```

for i in range(mb_size):
    full_matrix_1 = torch.einsum('pqk, ip,jq,kr->ijr', [core_tensor, q[i],
        k[i], v[i]]).contiguous()
    full_matrixs.append(torch.sum(full_matrix_1, dim=1))
output = torch.stack(full_matrixs).cuda().float()
return output

```

---

Each Single block attention is a component of Multi-linear attention. Based on the Single block attention, the Multi-linear attention can be given as follows.

---

```

class MultiLinearAttention(nn.Module):

    ''' MultiLinearAttention '''

    def __init__(self, h, Rank, d, dropout=0.1):
        super(MultiLinearAttention, self).__init__()
        self.n_head = h # h is equal to 2 in our model
        self.d_k = d
        self.d_v = d
        self.w_q = nn.Parameter(torch.FloatTensor(d_model, d_k))
        self.w_k = nn.Parameter(torch.FloatTensor(d_model, d_k))
        self.w_v = nn.Parameter(torch.FloatTensor(d_model, d_v))
        self.Tattention = SingleCoreAttention(Rank)
        self.layer_norm = LayerNormalization(Rank)
        self.proj = Linear(self.n_head*d, Rank)
        self.dropout = nn.Dropout(dropout)
        init.xavier_normal_(self.w_q)
        init.xavier_normal_(self.w_k)
        init.xavier_normal_(self.w_v)

    def forward(self, q, k, v):

        d_k, d_v = self.d_k, self.d_v
        n_head = self.n_head
        residual = q
        mb_size, len_q, d_model = q.size()
        mb_size, len_k, d_model = k.size()
        mb_size, len_v, d_model = v.size()
        q_s = q.repeat(1, 1).view(-1, d_model)
        k_s = k.repeat(1, 1).view(-1, d_model)
        v_s = v.repeat(1, 1).view(-1, d_model)
        if n_head > 1:
            output_1 = self.Tattention(q_s, k_s, v_s, mb_size,d_v)
            output_2 = self.Tattention(q_s, k_s, v_s, mb_size,d_v)
            output = (output_1+output_2)*0.5
        else:
            ouput = self.Tattention(q_s, k_s, v_s, mb_size,d_v)
        # project back to residual size
        outputs = self.proj(outputs)
        outputs = self.dropout(outputs)
        return self.layer_norm(outputs + residual)

```

---

## References

- [1] Alexei Baevski and Michael Auli. Adaptive input representations for neural language modeling. *arXiv preprint arXiv:1809.10853*, 2018.
- [2] Andrzej Cichocki, Rafal Zdunek, Anh Huy Phan, and Shun-ichi Amari. *Nonnegative matrix and tensor factorizations: applications to exploratory multi-way data analysis and blind source separation*. John Wiley & Sons, 2009.

- [3] Zihang Dai, Zhilin Yang, Yiming Yang, William W Cohen, Jaime Carbonell, Quoc V Le, and Ruslan Salakhutdinov. Transformer-xl: Attentive language models beyond a fixed-length context. *arXiv preprint arXiv:1901.02860*, 2019.
- [4] Hakan Inan, Khashayar Khosravi, and Richard Socher. Tying word vectors and word classifiers: A loss framework for language modeling. *arXiv preprint arXiv:1611.01462*, 2016.
- [5] Valentin Khrulkov, Oleksii Hrinchuk, Leyla Mirvakhabova, and Ivan Oseledets. Tensorized embedding layers for efficient model compression. *arXiv preprint arXiv:1901.10787*, 2019.
- [6] Stephen Merity, Nitish Shirish Keskar, and Richard Socher. An analysis of neural language modeling at multiple scales. *arXiv preprint arXiv:1803.08240*, 2018.
- [7] Alec Radford Rewon Child, Scott Gray and Ilya Sutskever. Generating long sequences with sparse transformer. *arXiv preprint arXiv:1904.10509*, 2019.
- [8] Ashish Vaswani, Noam Shazeer, Niki Parmar, Jakob Uszkoreit, Llion Jones, Aidan N Gomez, Łukasz Kaiser, and Illia Polosukhin. Attention is all you need. In *Advances in neural information processing systems*, pages 5998–6008, 2017.
- [9] Zhilin Yang, Zihang Dai, Ruslan Salakhutdinov, and William W Cohen. Breaking the softmax bottleneck: A high-rank rnn language model. *arXiv preprint arXiv:1711.03953*, 2017.
- [10] Barret Zoph and Quoc V Le. Neural architecture search with reinforcement learning. *arXiv preprint arXiv:1611.01578*, 2016.
